# Supplementary material for: Multimorbidity patterns and the relation to self-rated health among older Japanese people: a nationwide cross-sectional study
Source: HighWire-hosted journal article supplement (doi:10.1136/bmjopen-2022-063729), 2022-09-01
Supplement: bmjopen-2022-063729supp001_data_supplement.pdf [file bmjopen-2022-063729supp001_data_supplement.pdf]

## Supplemental Figure 1. Participant flow chart.

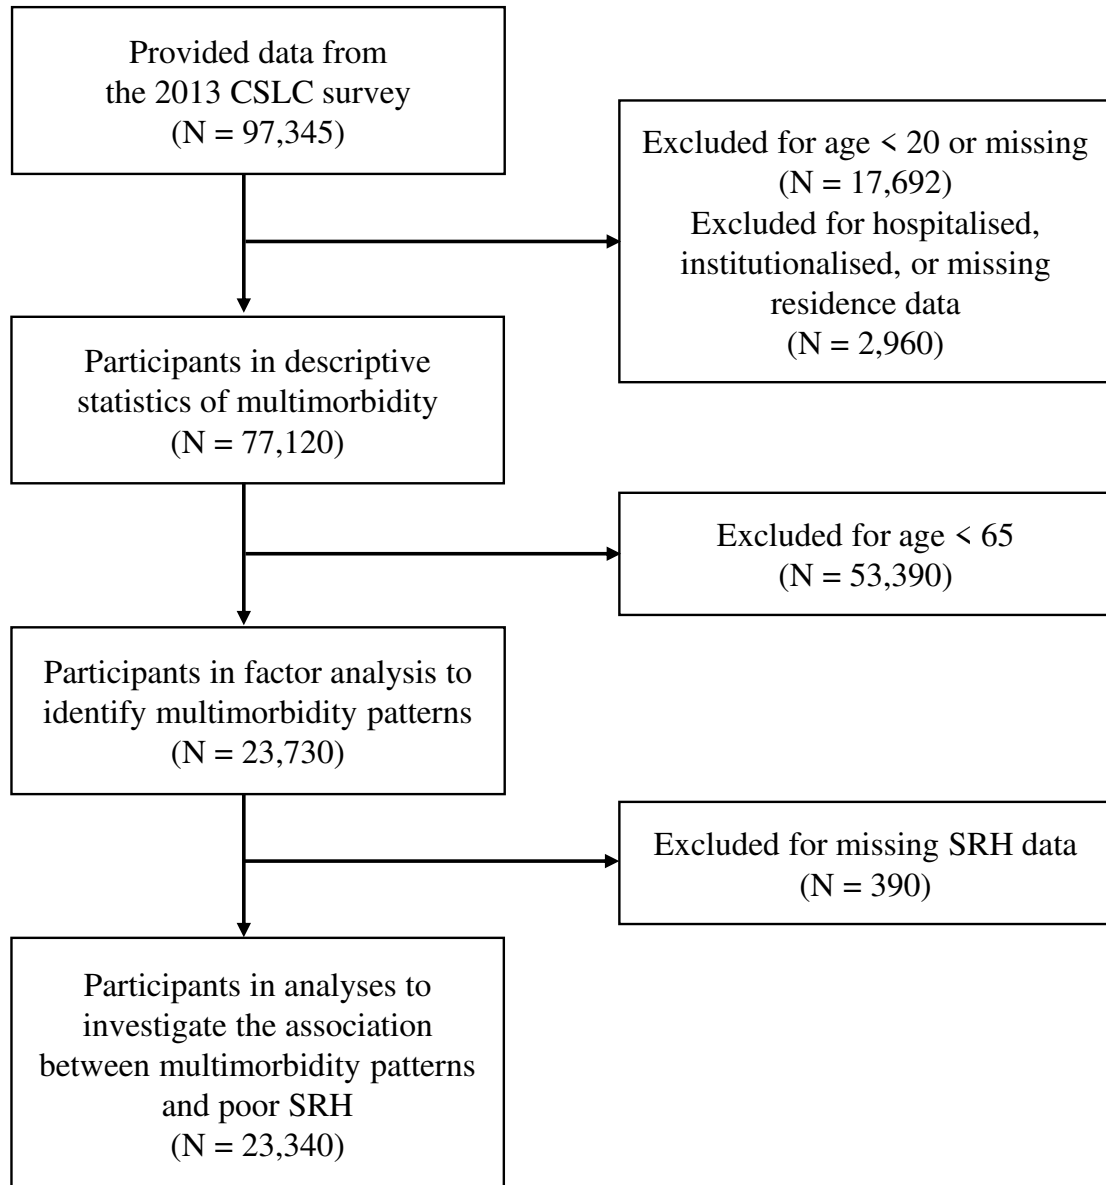

CSLC, the Comprehensive Survey of Living Conditions; SRH, self-rated health

Supplemental Table 1. Associations between multimorbidity pattern scores and poor SRH. Modified Poisson regression analyses without K6.

|                                      | Malignant/digestive/urologic/haematologic pattern |         |                                     |         | Degenerative/mental health pattern*    |         |                                     |         | Cardiovascular/metabolic pattern       |         |                                     |         |
|--------------------------------------|---------------------------------------------------|---------|-------------------------------------|---------|----------------------------------------|---------|-------------------------------------|---------|----------------------------------------|---------|-------------------------------------|---------|
|                                      | Complete case analysis<br>(N = 19,930)            |         | Multiple imputation<br>(N = 23,340) |         | Complete case analysis<br>(N = 19,930) |         | Multiple imputation<br>(N = 23,340) |         | Complete case analysis<br>(N = 19,930) |         | Multiple imputation<br>(N = 23,340) |         |
|                                      | Poor SRH<br>(aRR (95% CI))                        | P value | Poor SRH<br>(aRR (95% CI))          | P value | Poor SRH<br>(aRR (95% CI))             | P value | Poor SRH<br>(aRR (95% CI))          | P value | Poor SRH<br>(aRR (95% CI))             | P value | Poor SRH<br>(aRR (95% CI))          | P value |
| <b>Multimorbidity pattern score†</b> | 1.68 (1.62-1.75)                                  | <0.001  | 1.69 (1.63-1.75)                    | <0.001  | 1.65 (1.60-1.69)                       | <0.001  | 1.65 (1.61-1.69)                    | <0.001  | 1.30 (1.25-1.34)                       | <0.001  | 1.29 (1.26-1.34)                    | <0.001  |
| <b>Age (years)</b>                   |                                                   |         |                                     |         |                                        |         |                                     |         |                                        |         |                                     |         |
| 65-69                                | ref                                               |         | ref                                 |         | ref                                    |         | ref                                 |         | ref                                    |         | ref                                 |         |
| 70-74                                | 1.18 (1.09-1.28)                                  | <0.001  | 1.19 (1.10-1.28)                    | <0.001  | 1.14 (1.06-1.24)                       | 0.001   | 1.15 (1.07-1.23)                    | <0.001  | 1.19 (1.10-1.29)                       | <0.001  | 1.19 (1.11-1.28)                    | <0.001  |
| 75-79                                | 1.53 (1.41-1.65)                                  | <0.001  | 1.49 (1.39-1.60)                    | <0.001  | 1.41 (1.30-1.52)                       | <0.001  | 1.38 (1.29-1.49)                    | <0.001  | 1.55 (1.43-1.67)                       | <0.001  | 1.51 (1.41-1.63)                    | <0.001  |
| 80-84                                | 1.83 (1.69-1.98)                                  | <0.001  | 1.82 (1.69-1.96)                    | <0.001  | 1.69 (1.56-1.83)                       | <0.001  | 1.69 (1.57-1.82)                    | <0.001  | 1.90 (1.75-2.06)                       | <0.001  | 1.89 (1.75-2.04)                    | <0.001  |
| 85-89                                | 2.05 (1.87-2.24)                                  | <0.001  | 2.06 (1.90-2.24)                    | <0.001  | 1.90 (1.74-2.08)                       | <0.001  | 1.92 (1.77-2.09)                    | <0.001  | 2.13 (1.95-2.33)                       | <0.001  | 2.13 (1.96-2.32)                    | <0.001  |
| ≥90                                  | 2.08 (1.85-2.33)                                  | <0.001  | 2.00 (1.79-2.24)                    | <0.001  | 2.01 (1.79-2.26)                       | <0.001  | 1.95 (1.74-2.17)                    | <0.001  | 2.16 (1.92-2.42)                       | <0.001  | 2.08 (1.87-2.33)                    | <0.001  |
| <b>Female sex</b>                    | 1.13 (1.08-1.19)                                  | <0.001  | 1.13 (1.08-1.19)                    | <0.001  | 0.96 (0.92-1.01)                       | 0.15    | 0.96 (0.92-1.01)                    | 0.12    | 1.03 (0.98-1.09)                       | 0.21    | 1.03 (0.98-1.08)                    | 0.21    |
| <b>Educational level</b>             |                                                   |         |                                     |         |                                        |         |                                     |         |                                        |         |                                     |         |
| Less than high school                | ref                                               |         | ref                                 |         | ref                                    |         | ref                                 |         | ref                                    |         | ref                                 |         |
| High school                          | 0.91 (0.86-0.96)                                  | <0.001  | 0.91 (0.86-0.96)                    | <0.001  | 0.91 (0.87-0.96)                       | <0.001  | 0.91 (0.87-0.96)                    | <0.001  | 0.91 (0.87-0.96)                       | <0.001  | 0.91 (0.87-0.96)                    | <0.001  |
| More than high school                | 0.83 (0.77-0.89)                                  | <0.001  | 0.83 (0.77-0.90)                    | <0.001  | 0.85 (0.78-0.91)                       | <0.001  | 0.85 (0.79-0.92)                    | <0.001  | 0.84 (0.78-0.91)                       | <0.001  | 0.85 (0.79-0.92)                    | <0.001  |

SRH, self-rated health; K6, Kessler 6; aRR, adjusted risk ratio; CI, confidence interval

Adjusted for age, sex, and educational level.

\*Degenerative/mental health pattern consisted of ear, eye, and musculoskeletal system diseases and mental disorders.

†Multimorbidity pattern scores corresponded to the number of affected body system-dependent clusters in each pattern.

Each pattern score was individually included in the model, adjusted for age, sex, and educational level.

Supplemental Table 2. Associations between multimorbidity pattern scores and poor SRH. Modified Poisson regression analyses with K6.

|                                      | Malignant/digestive/urologic/haematologic pattern |         |                                     |         | Degenerative/mental health pattern*    |         |                                     |         | Cardiovascular/metabolic pattern       |         |                                     |         |
|--------------------------------------|---------------------------------------------------|---------|-------------------------------------|---------|----------------------------------------|---------|-------------------------------------|---------|----------------------------------------|---------|-------------------------------------|---------|
|                                      | Complete case analysis<br>(N = 18,534)            |         | Multiple imputation<br>(N = 23,340) |         | Complete case analysis<br>(N = 18,534) |         | Multiple imputation<br>(N = 23,340) |         | Complete case analysis<br>(N = 18,534) |         | Multiple imputation<br>(N = 23,340) |         |
|                                      | Poor SRH<br>(aRR (95% CI))                        | P value | Poor SRH<br>(aRR (95% CI))          | P value | Poor SRH<br>(aRR (95% CI))             | P value | Poor SRH<br>(aRR (95% CI))          | P value | Poor SRH<br>(aRR (95% CI))             | P value | Poor SRH<br>(aRR (95% CI))          | P value |
| <b>Multimorbidity pattern score†</b> | 1.49 (1.44-1.56)                                  | <0.001  | 1.49 (1.44-1.54)                    | <0.001  | 1.47 (1.43-1.51)                       | <0.001  | 1.46 (1.42-1.50)                    | <0.001  | 1.24 (1.20-1.29)                       | <0.001  | 1.24 (1.20-1.28)                    | <0.001  |
| <b>Age (years)</b>                   |                                                   |         |                                     |         |                                        |         |                                     |         |                                        |         |                                     |         |
| 65-69                                | ref                                               |         | ref                                 |         | ref                                    |         | ref                                 |         | ref                                    |         | ref                                 |         |
| 70-74                                | 1.15 (1.06-1.25)                                  | <0.001  | 1.17 (1.09-1.25)                    | <0.001  | 1.12 (1.04-1.21)                       | 0.005   | 1.14 (1.06-1.22)                    | <0.001  | 1.16 (1.07-1.25)                       | <0.001  | 1.17 (1.09-1.25)                    | <0.001  |
| 75-79                                | 1.51 (1.40-1.63)                                  | <0.001  | 1.46 (1.37-1.57)                    | <0.001  | 1.41 (1.31-1.53)                       | <0.001  | 1.38 (1.29-1.48)                    | <0.001  | 1.52 (1.40-1.64)                       | <0.001  | 1.48 (1.38-1.58)                    | <0.001  |
| 80-84                                | 1.75 (1.61-1.90)                                  | <0.001  | 1.71 (1.59-1.84)                    | <0.001  | 1.64 (1.51-1.78)                       | <0.001  | 1.61 (1.50-1.73)                    | <0.001  | 1.78 (1.64-1.93)                       | <0.001  | 1.74 (1.63-1.87)                    | <0.001  |
| 85-89                                | 1.86 (1.69-2.04)                                  | <0.001  | 1.85 (1.71-2.01)                    | <0.001  | 1.76 (1.61-1.93)                       | <0.001  | 1.77 (1.63-1.92)                    | <0.001  | 1.89 (1.73-2.07)                       | <0.001  | 1.89 (1.74-2.05)                    | <0.001  |
| ≥90                                  | 1.82 (1.62-2.05)                                  | <0.001  | 1.73 (1.56-1.92)                    | <0.001  | 1.81 (1.61-2.04)                       | <0.001  | 1.72 (1.54-1.91)                    | <0.001  | 1.87 (1.66-2.10)                       | <0.001  | 1.76 (1.59-1.96)                    | <0.001  |
| <b>Female sex</b>                    | 1.06 (1.01-1.12)                                  | 0.031   | 1.05 (1.00-1.10)                    | 0.039   | 0.93 (0.88-0.98)                       | 0.005   | 0.92 (0.88-0.97)                    | <0.001  | 0.98 (0.93-1.03)                       | 0.45    | 0.97 (0.93-1.02)                    | 0.25    |
| <b>Educational level</b>             |                                                   |         |                                     |         |                                        |         |                                     |         |                                        |         |                                     |         |
| Less than high school                | ref                                               |         | ref                                 |         | ref                                    |         | ref                                 |         | ref                                    |         | ref                                 |         |
| High school                          | 0.93 (0.88-0.98)                                  | 0.009   | 0.94 (0.89-0.98)                    | 0.009   | 0.93 (0.88-0.99)                       | 0.012   | 0.94 (0.89-0.99)                    | 0.011   | 0.94 (0.89-0.99)                       | 0.018   | 0.94 (0.90-0.99)                    | 0.023   |
| More than high school                | 0.89 (0.83-0.97)                                  | 0.004   | 0.89 (0.83-0.96)                    | 0.002   | 0.91 (0.84-0.98)                       | 0.016   | 0.91 (0.85-0.98)                    | 0.009   | 0.91 (0.84-0.98)                       | 0.014   | 0.91 (0.85-0.98)                    | 0.012   |
| <b>K6 score</b>                      |                                                   |         |                                     |         |                                        |         |                                     |         |                                        |         |                                     |         |
| 0-4 (normal)                         | ref                                               |         | ref                                 |         | ref                                    |         | ref                                 |         | ref                                    |         | ref                                 |         |
| 5-12 (psychological distress)        | 2.57 (2.44-2.71)                                  | <0.001  | 2.61 (2.48-2.74)                    | <0.001  | 2.47 (2.34-2.61)                       | <0.001  | 2.50 (2.38-2.63)                    | <0.001  | 2.64 (2.50-2.78)                       | <0.001  | 2.66 (2.53-2.79)                    | <0.001  |
| 13-24 (severe mental illness)        | 4.31 (4.04-4.60)                                  | <0.001  | 4.29 (4.05-4.55)                    | <0.001  | 3.98 (3.71-4.26)                       | <0.001  | 3.97 (3.72-4.23)                    | <0.001  | 4.57 (4.29-4.86)                       | <0.001  | 4.56 (4.31-4.83)                    | <0.001  |

SRH, self-rated health; K6, Kessler 6; aRR, adjusted risk ratio; CI, confidence interval

Adjusted for age, sex, educational level, and K6.

\*Degenerative/mental health pattern consisted of ear, eye, and musculoskeletal system diseases and mental disorders.

†Multimorbidity pattern scores corresponded to the number of affected body system-dependent clusters in each pattern.

Each pattern score was individually included in the model, adjusted for age, sex, educational level, and K6 score.
